# Supplementary material for: Contrasting latitudinal evolution of East Asian monsoonal precipitation during the Last Interglacial (130–120 ka)
Source: Springer Nature journal article supplement (doi:10.1038/s41612-024-00574-9), 2024-01-23
Supplement: 41612_2024_574_MOESM1_ESM.pdf [file 41612_2024_574_MOESM1_ESM.pdf]

**Supplementary material for**

**Contrasting latitudinal evolution of East Asian monsoonal precipitation during  
the Last Interglacial (130–120 ka)**

Nanxuan Jiang<sup>1,3</sup>, Qing Yan<sup>1,2\*</sup>, Huijun Wang<sup>2,1</sup>

<sup>1</sup>Nansen-Zhu International Research Centre, Institute of Atmospheric Physics,  
Chinese Academy of Sciences, Beijing, China

<sup>2</sup>Key Laboratory of Meteorological Disaster/Collaborative Innovation Center on  
Forecast and Evaluation of Meteorological Disasters, Nanjing University of  
Information Science and Technology, Nanjing, China

<sup>3</sup>University of Chinese Academy of Sciences, Beijing, China

**Corresponding Author:** Qing Yan

**Supplementary Table 1** Forcings of LIG\_130 ka and PI experiments

|                           | 130 ka (LIG_130ka)        | 1950 A.D. (PI) |
|---------------------------|---------------------------|----------------|
| <b>Orbital parameters</b> |                           |                |
| Eccentricity              | 0.038209                  | 0.016724       |
| Obliquity (degrees)       | 24.242                    | 23.446         |
| Perihelion-180 (degrees)  | 228.32                    | 102.04         |
| Vernal equinox            | Fixed to noon on 21 March |                |
| <b>Greenhouse gases</b>   |                           |                |
| CO <sub>2</sub> (ppm)     | 258                       | 280            |
| CH <sub>4</sub> (ppb)     | 518                       | 760            |
| N <sub>2</sub> O (ppb)    | 238                       | 270            |
| Other GHGs                | 0                         | PI             |
| Ice sheets                |                           | PI             |
| Vegetation                |                           | PI             |

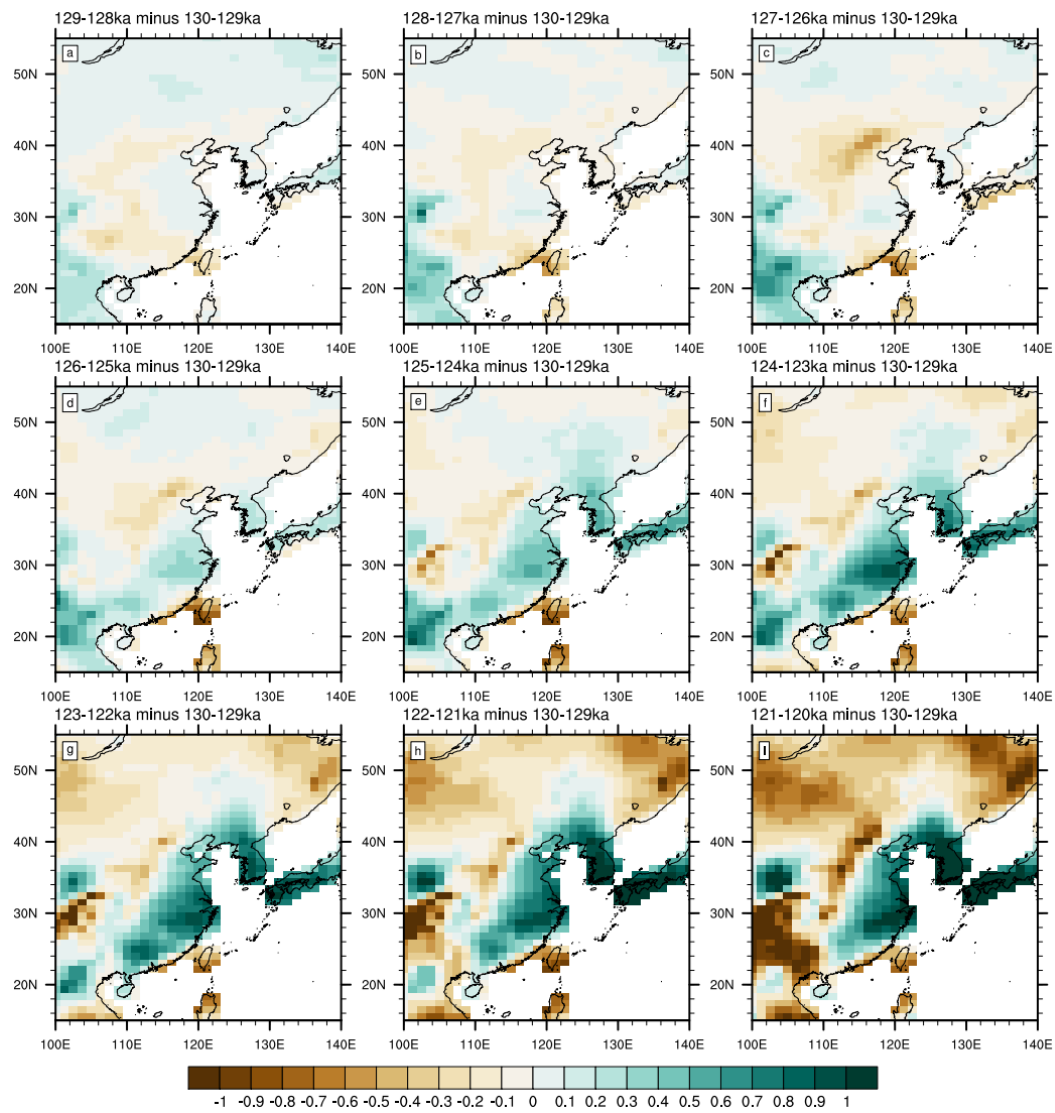

**Supplementary Figure 1** Anomaly of precipitation over East Asia between 120 ka and 130 ka at every 1 ka interval (units:  $\text{mm d}^{-1}$ ).

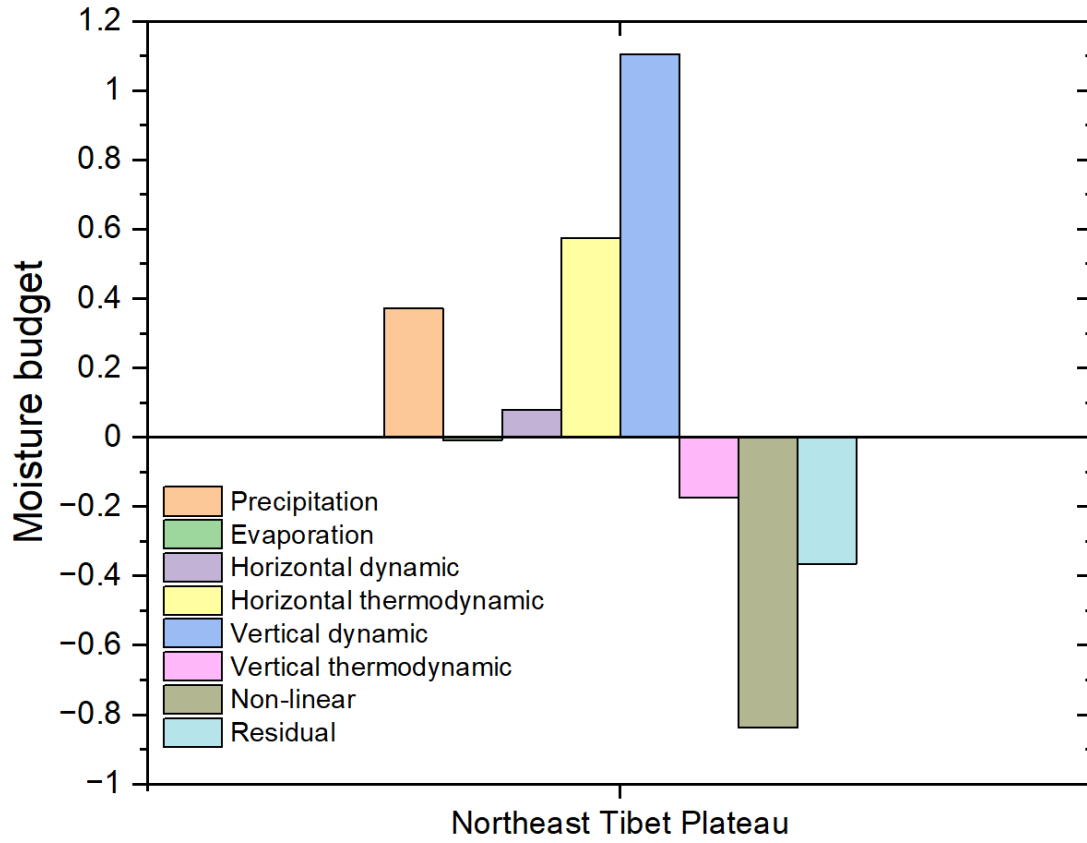

**Supplementary Figure 2** Moisture budget analysis over the northeastern Tibetan Plateau between 121–120 ka and 130–129 ka (units: mm d<sup>-1</sup>).

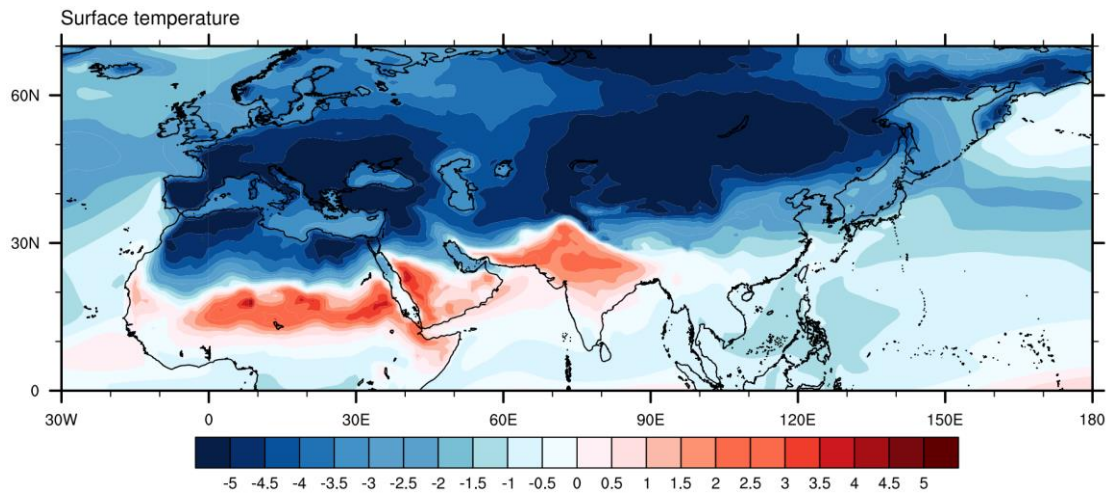

**Supplementary Figure 3** Anomaly of surface temperature between 121–120 ka and 130–129 ka (units: °C).

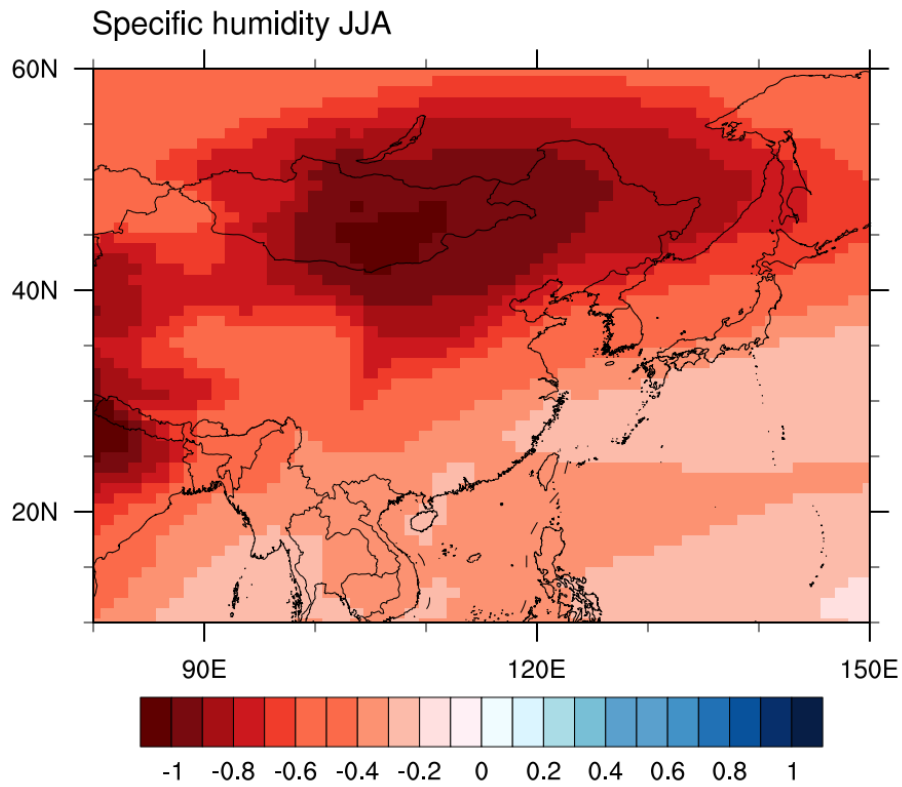

**Supplementary Figure 4** Anomaly of vertically-averaged specific humidity at 300–1000 hPa in summer between 121–120 ka and 130–129 ka (units: g kg<sup>-1</sup>).

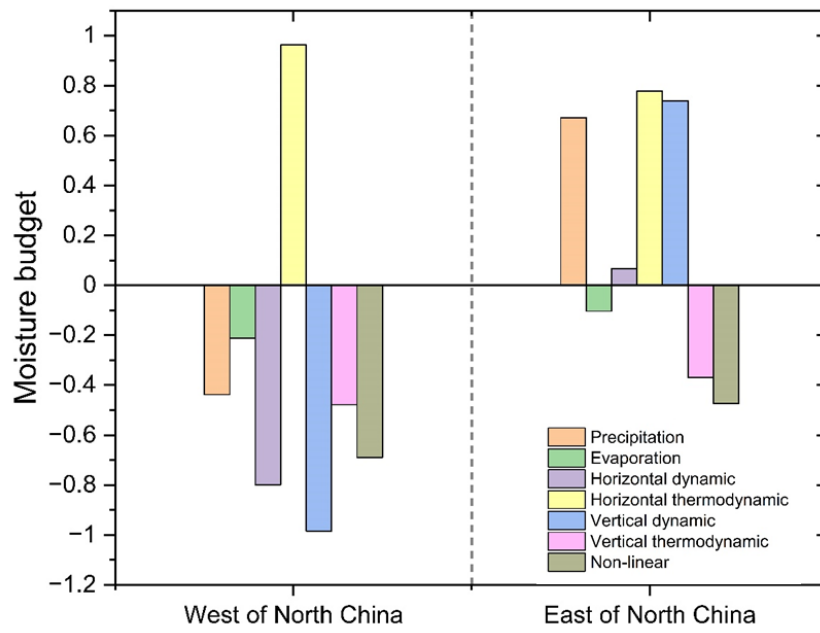

**Supplementary Figure 5** Moisture budget analysis over the west of North China (35–45°N, 110–115°E) and the east of North China (35–45°N, 120–130°E) between 121–120 ka and 130–129 ka (units: mm d<sup>-1</sup>).

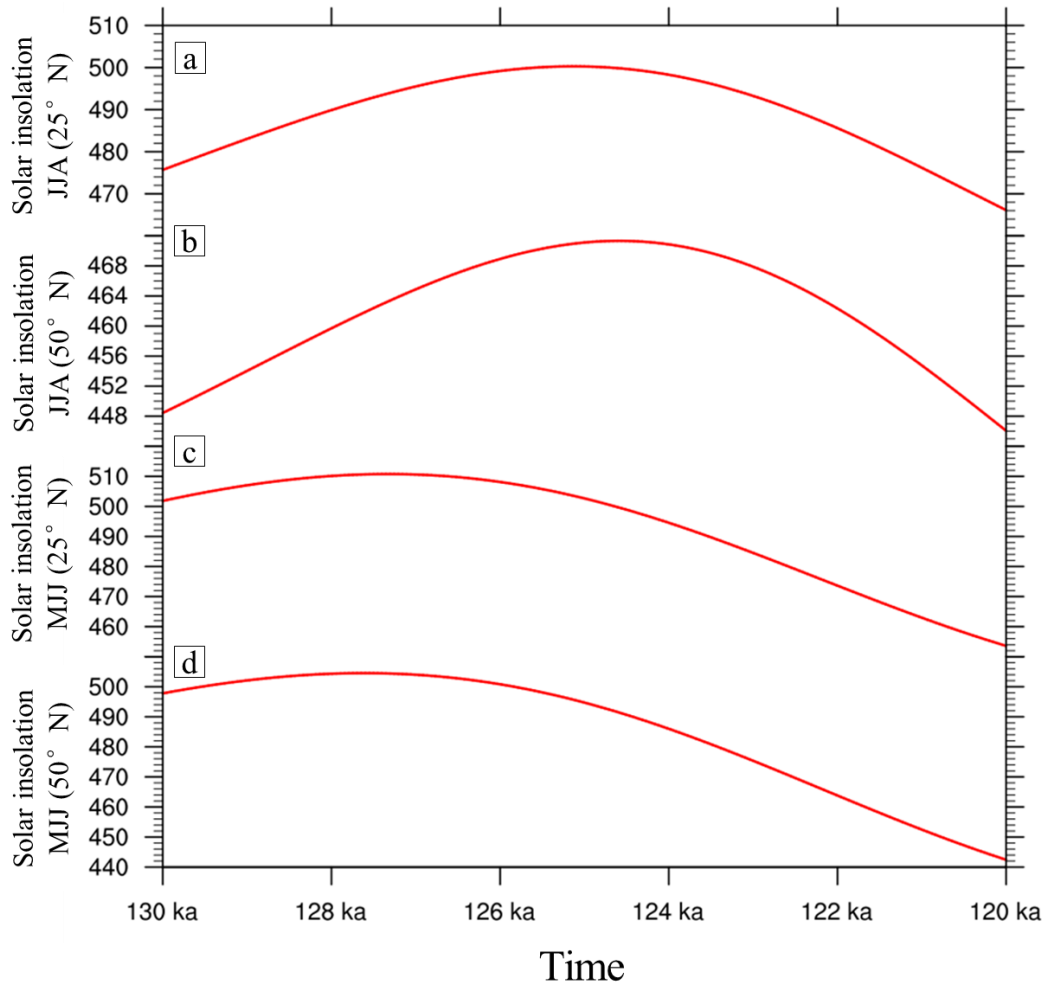

**Supplementary Figure 6** Evolution of solar insolation in the top of the atmosphere (a) at 25°N in JJA, (b) at 50°N in JJA, (c) at 25°N in MJJ, and (d) at 50°N in MJJ between 130 ka and 120 ka during the LIG (units:  $W m^{-2}$ ).



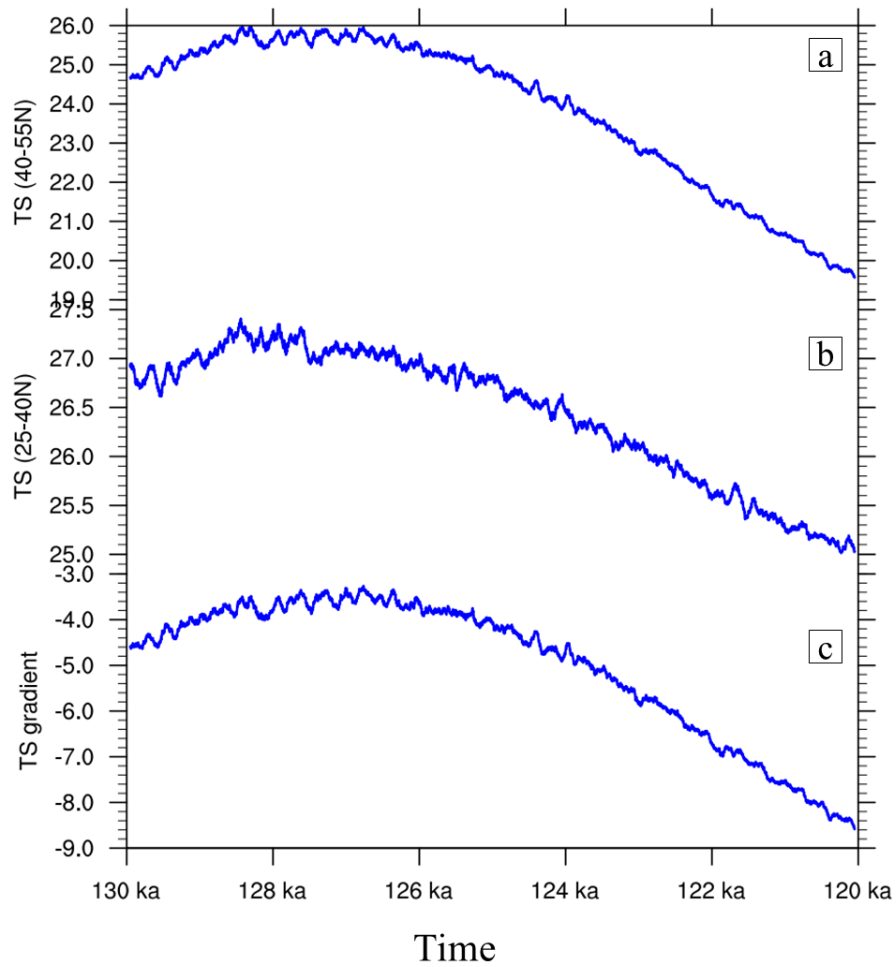

**Supplementary Figure 7** Evolution of surface temperature (a) over northeast Asia/North China (40–55°N, 110–130°E) and (b) south China/North China (25–40°N, 110–130°E), and (c) surface temperature gradient between northeast Asia (45–55°N, 110–130°E) and South China Sea (10–20°N, 110–130°E) applying a 101-yr running average (units: °C).

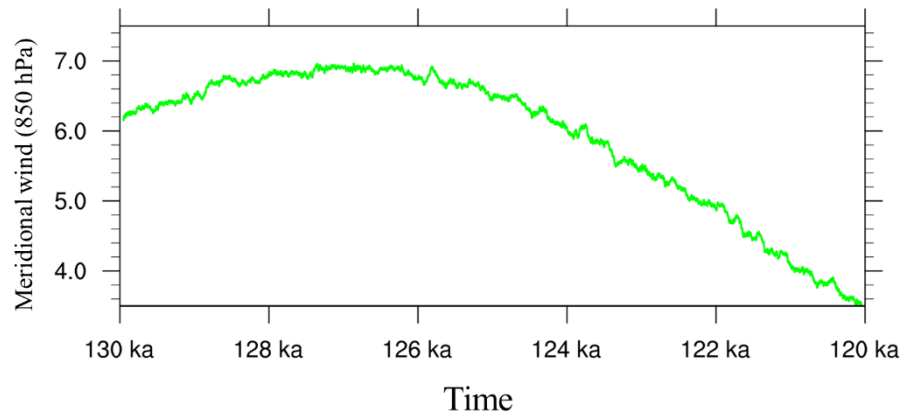

**Supplementary Figure 8** Evolution of meridional wind indicating variations of monsoonal circulation over south and North China (25–40°N, 105–120°E) applying a 101-yr running average (units: m s<sup>-1</sup>).

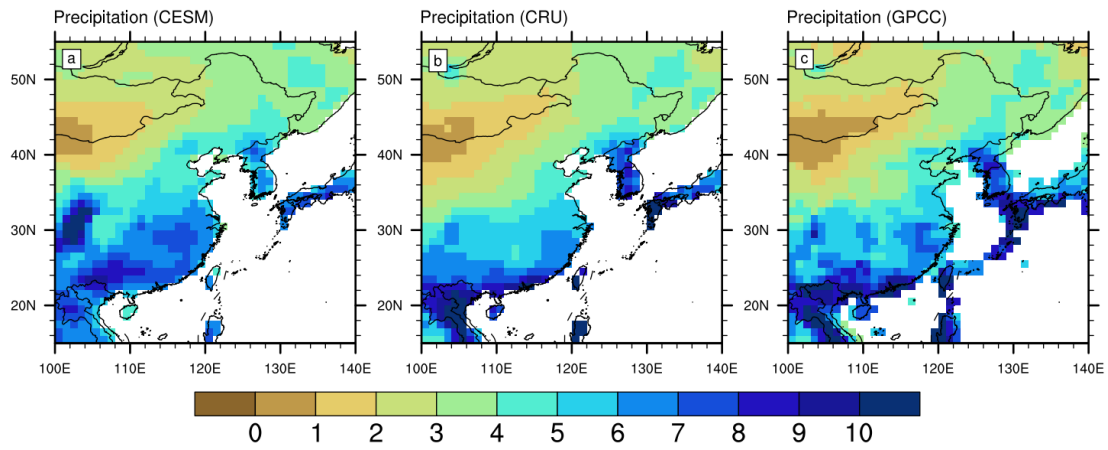

**Supplementary Figure 9** Summer precipitation based on (a) control run in the CESM1.2, (b) long-term mean from Climatic Research Unit during 1901–2016, and (c) Global Precipitation Climatology Centre during 1901–2016 over eastern China (units: mm d<sup>-1</sup>). All results are interpolated into 1°×1° to facilitate the model–observation comparisons.

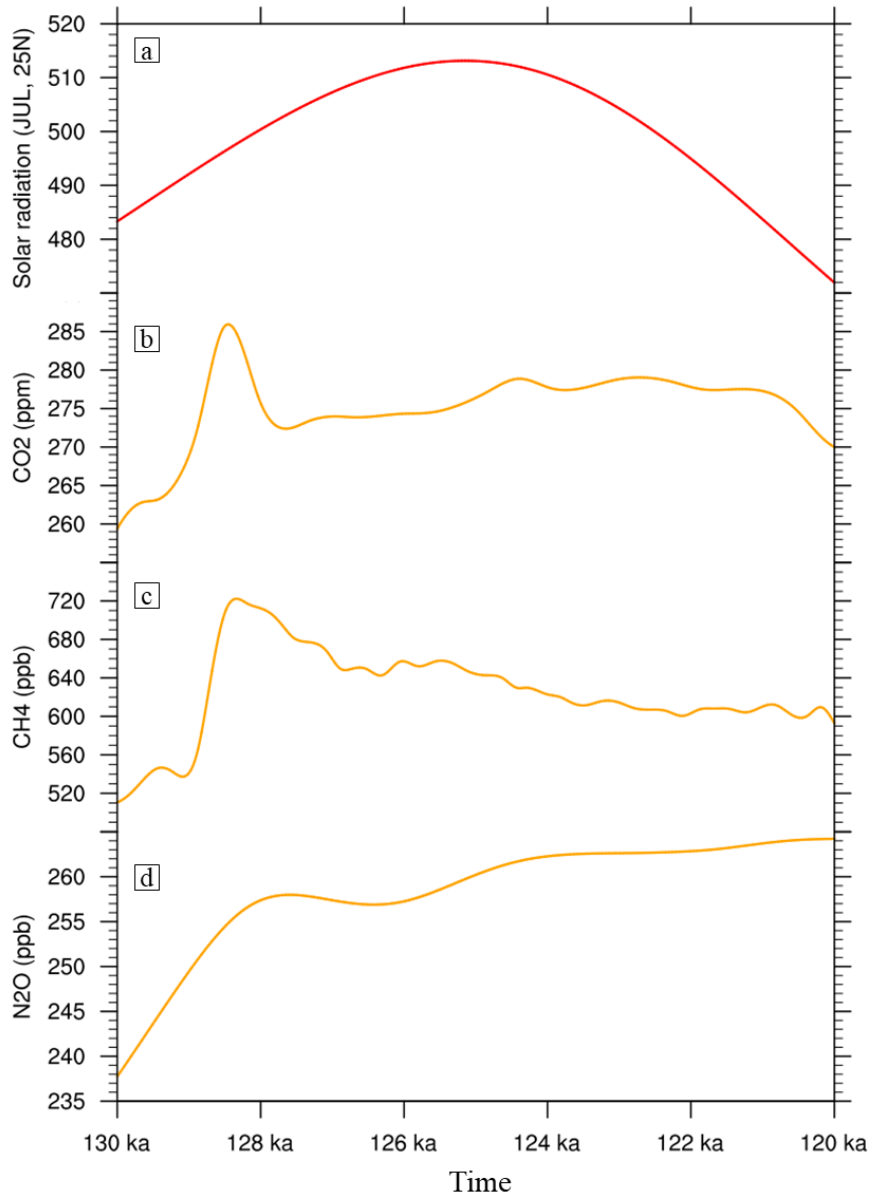

**Supplementary Figure 10** Evolution of (a) solar insolation at 25°N in July (units: W m<sup>-2</sup>), (b) atmospheric CO<sub>2</sub> (units: ppm), (c) CH<sub>4</sub> (units: ppb), and (d) N<sub>2</sub>O (units: ppb) in the transient simulation between 130 ka and 120 ka during the LIG.
